# Supplementary material for: Epigenetic and transcriptional signatures of stable versus plastic differentiation of proinflammatory γδ T cell subsets
Source: Springer Nature journal article supplement (doi:10.1038/ni.2702), 2013-09-01
Supplement: 41590_2013_BFni2702_MOESM158_ESM.pdf [file 41590_2013_BFni2702_MOESM158_ESM.pdf]

## SUPPLEMENTARY FIGURES AND TABLES

### *Epigenetic and transcriptional signatures of stable versus plastic differentiation of proinflammatory $\gamma\delta$ T cell subsets*

Schmolka N, Serre K, Grosso A, Rei M, Pennington DJ, Gomes AQ, and Silva-Santos B

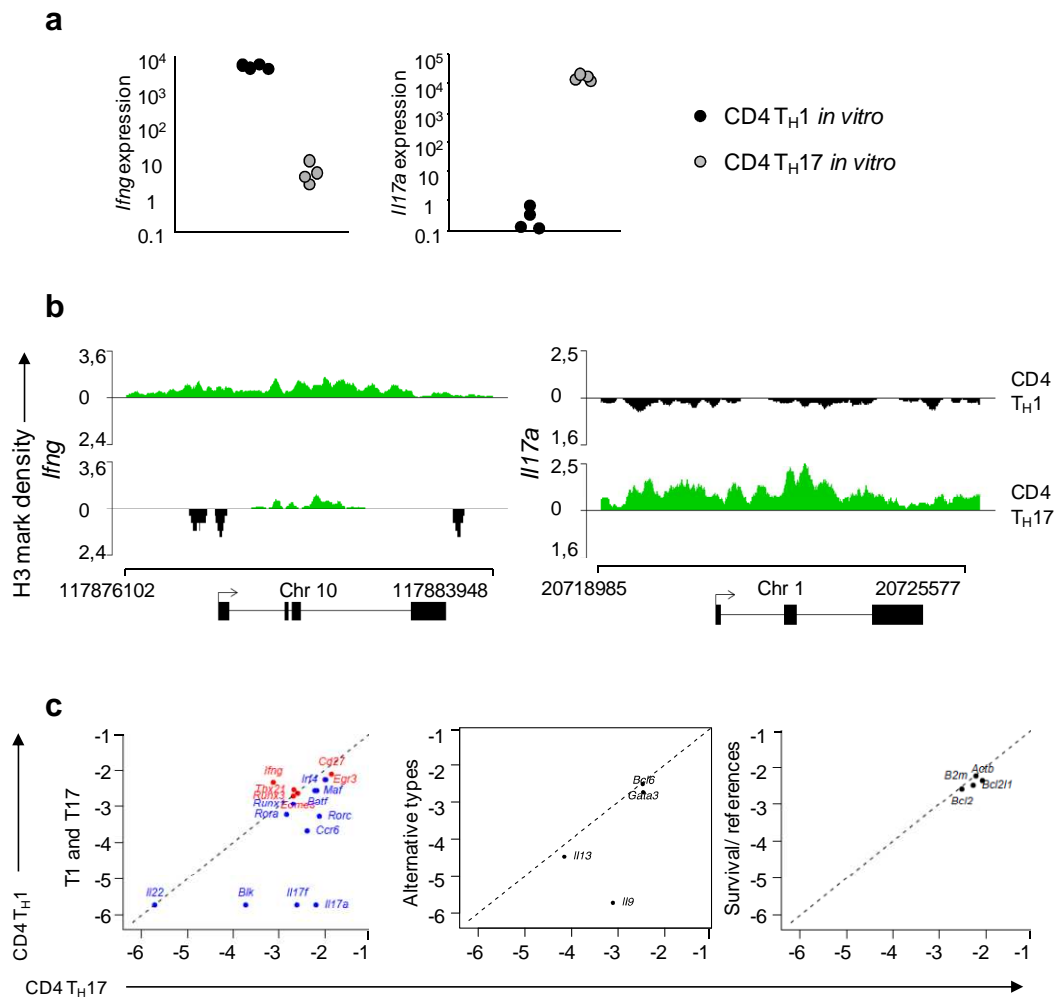

**Supplementary Fig. 1.** Histone modifications and transcription of *Ifng* and *Il17a* in CD4<sup>+</sup> T<sub>H</sub>1 and T<sub>H</sub>17 cell subsets. **(a)** RT-qPCR data for *Ifng* and *Il17a* expression (relative to *Actb*) on *in vitro*-generated (as described in Methods) CD4<sup>+</sup> T<sub>H</sub>1 or T<sub>H</sub>17 cells. **(b)** ChIP-seq plots for H3K4me2 (green) and H3K27me3 (black) modifications on *Ifng* and *Il17a* loci in CD4<sup>+</sup> T<sub>H</sub>1 or T<sub>H</sub>17 cells. **(c)** Pair-plots comparing quantitative levels (log<sub>10</sub>-transformed) of gene-specific H3K4me2 modifications between CD4<sup>+</sup> T<sub>H</sub>1 and T<sub>H</sub>17 cells. Genes were grouped as: type 1 (red) or type 17 (blue) factors; alternative effector cell types; and housekeeping reference or survival genes.

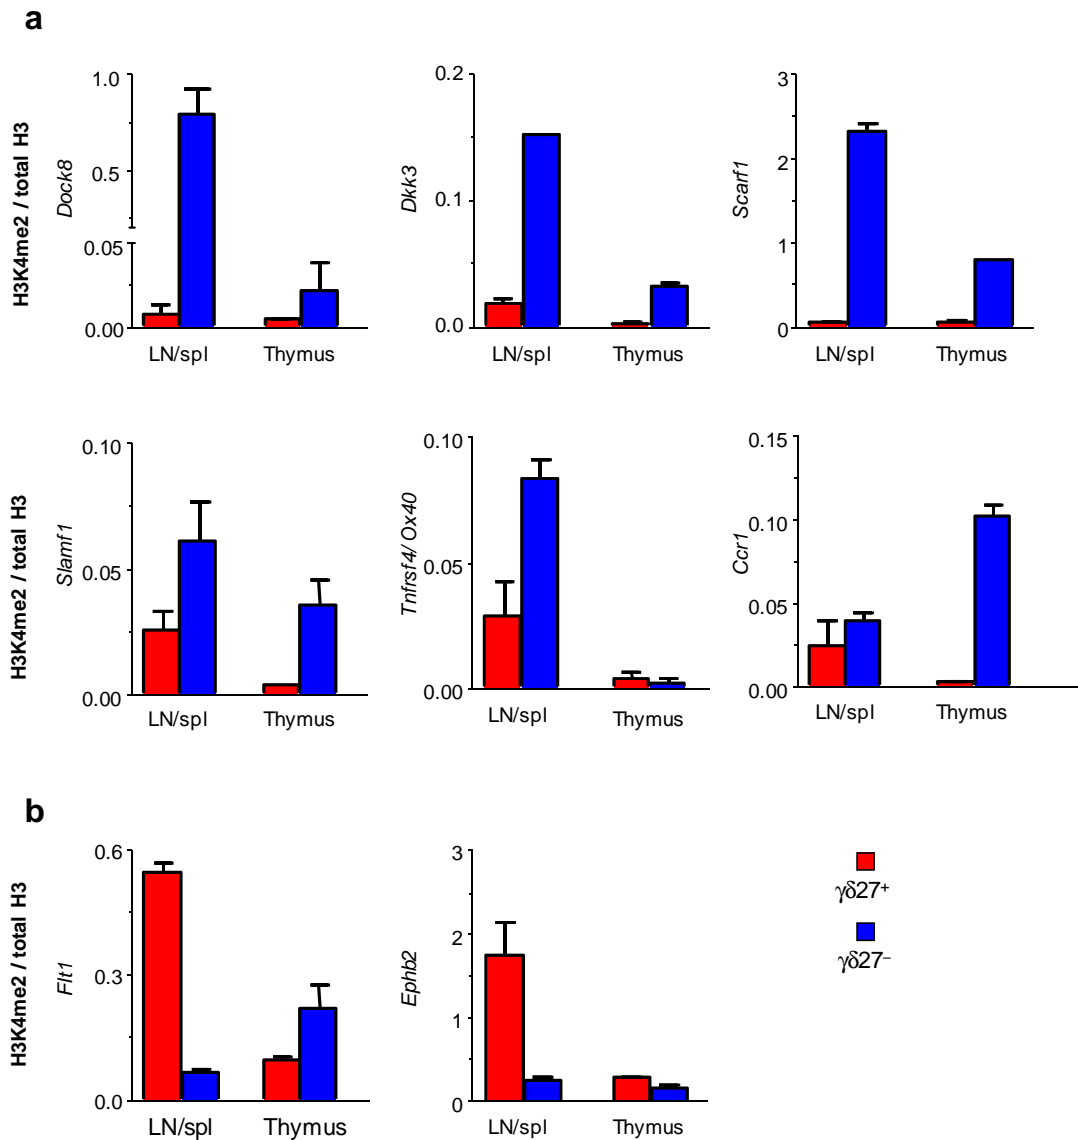

**Supplementary Fig. 2.** Permissive histone H3K4me2 modifications in candidate genes on thymic and peripheral  $\gamma\delta$  T cell subsets. Candidate genes (from Table 1) enriched for H3K4me2 modifications in  $CD27^-$  ( $\gamma\delta^{27-}$ ) (a) or  $CD27^+$  ( $\gamma\delta^{27+}$ ) (b)  $\gamma\delta$  T cells were analyzed by ChIP-qPCR on populations FACS-sorted from pooled lymph nodes and spleen (LN/spl) or from the thymus. Data are normalized against total H3 (mean  $\pm$  SD).

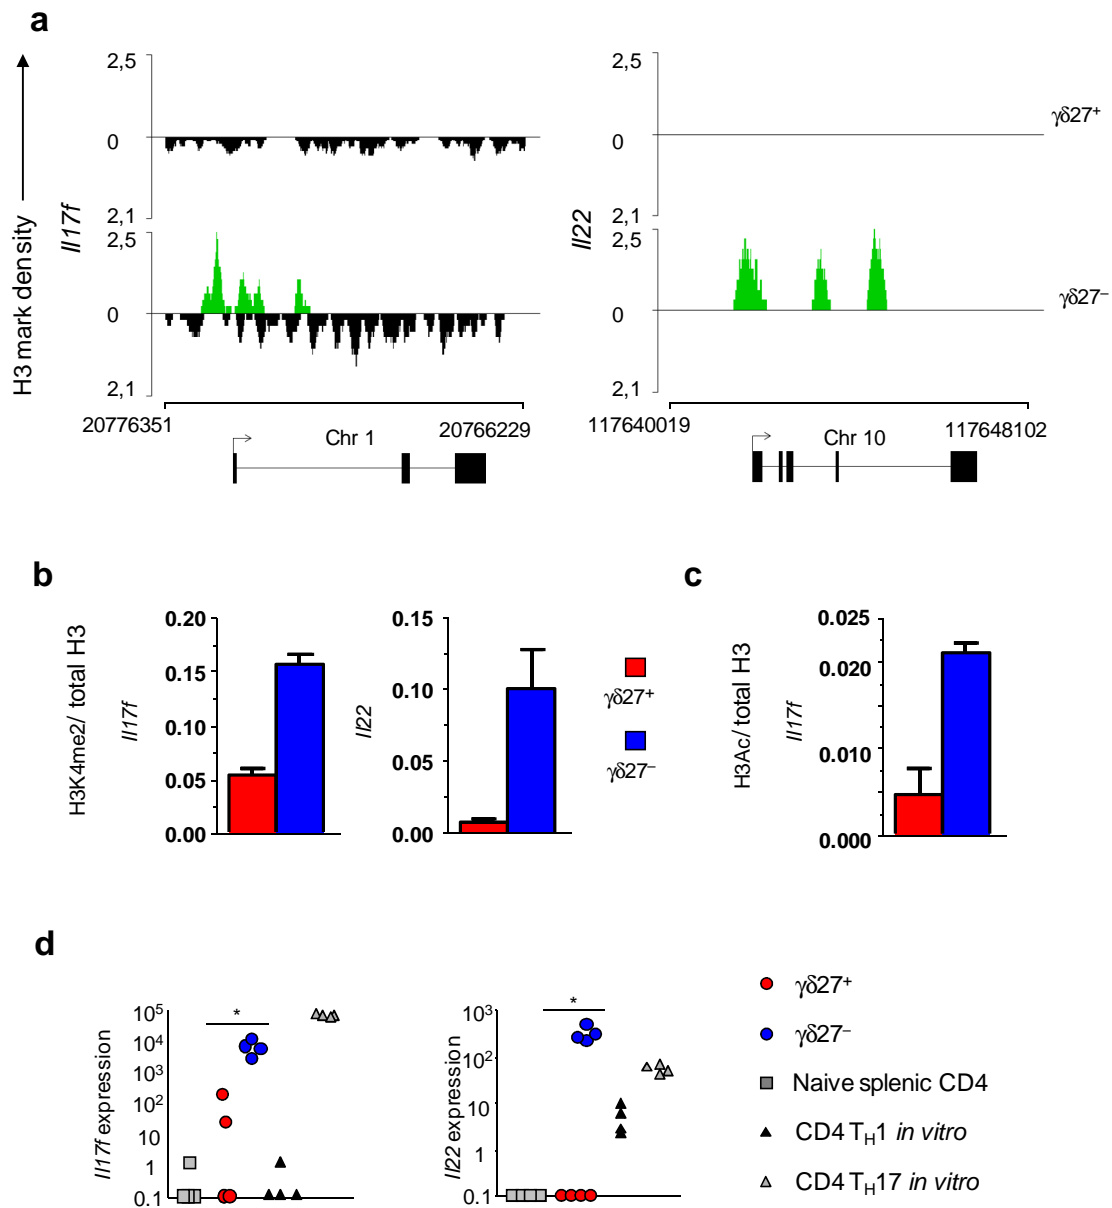

**Supplementary Fig. 3.** Histone modifications and transcription of *I17f* and *I22* in  $\gamma\delta$  T cell subsets. **(a)** ChIP-seq plots for H3K4me2 (green) and H3K27me3 (black) modifications on *I17f* and *I22* loci in peripheral CD27<sup>+</sup> ( $\gamma\delta^{27+}$ ) and CCR6<sup>+</sup> CD27<sup>-</sup> ( $\gamma\delta^{27-}$ )  $\gamma\delta$  T cells. **(b)** ChIP-qPCR validation of H3K4me2 modifications on *I17f* and *I22* in peripheral  $\gamma\delta^{27+}$  and  $\gamma\delta^{27-}$  T cells (mean  $\pm$  SD). **(c)** ChIP-qPCR for H3Ac modifications on the *I17f* promoter in peripheral  $\gamma\delta^{27+}$  and  $\gamma\delta^{27-}$  T cells (mean  $\pm$  SD). **(d)** RT-qPCR data for *I17f* and *I22* expression (relative to *Actb*) on populations derived from peripheral T cells: *ex vivo* CD4<sup>+</sup>, CD27<sup>+</sup> ( $\gamma\delta^{27+}$ ) and CCR6<sup>+</sup> CD27<sup>-</sup> ( $\gamma\delta^{27-}$ )  $\gamma\delta$  cells; and *in vitro*-generated CD4<sup>+</sup> T<sub>H1</sub> and T<sub>H17</sub> cells.

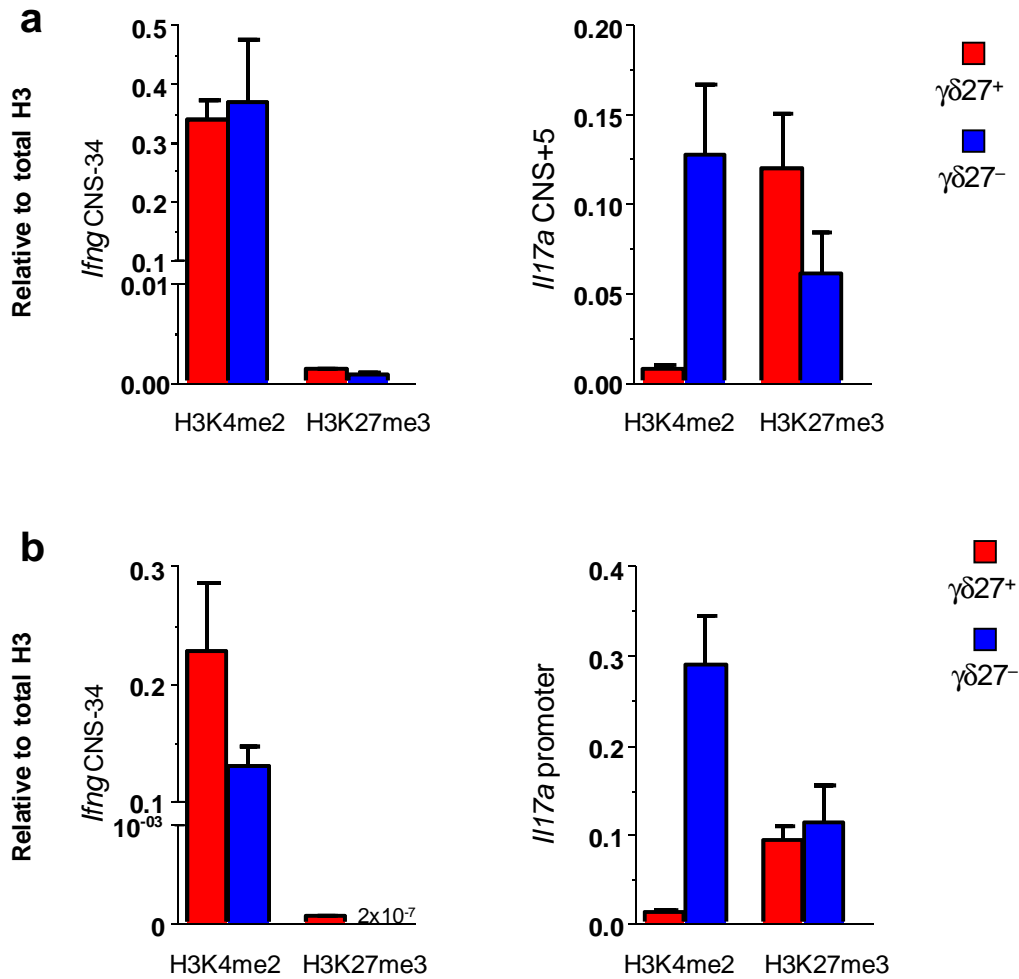

**Supplementary Fig. 4.** ChIP-qPCR validation of ChIP-seq data for H3K4me2 or H3K27me3 modifications on *Ifng* and *Il17a* loci in  $\gamma\delta$  T cell subsets. Peripheral **(a)** or thymic **(b)** CD27<sup>+</sup> ( $\gamma\delta^{27+}$ ) and CCR6<sup>+</sup> CD27<sup>-</sup> ( $\gamma\delta^{27-}$ )  $\gamma\delta$  T cells were analyzed by ChIP-qPCR for H3K4me2 and H3K27me3 modifications on *Ifng* (CNS-34 region) and *Il17a* (promoter or CNS+5 regions). Data are normalized against total H3 (mean  $\pm$  SD).

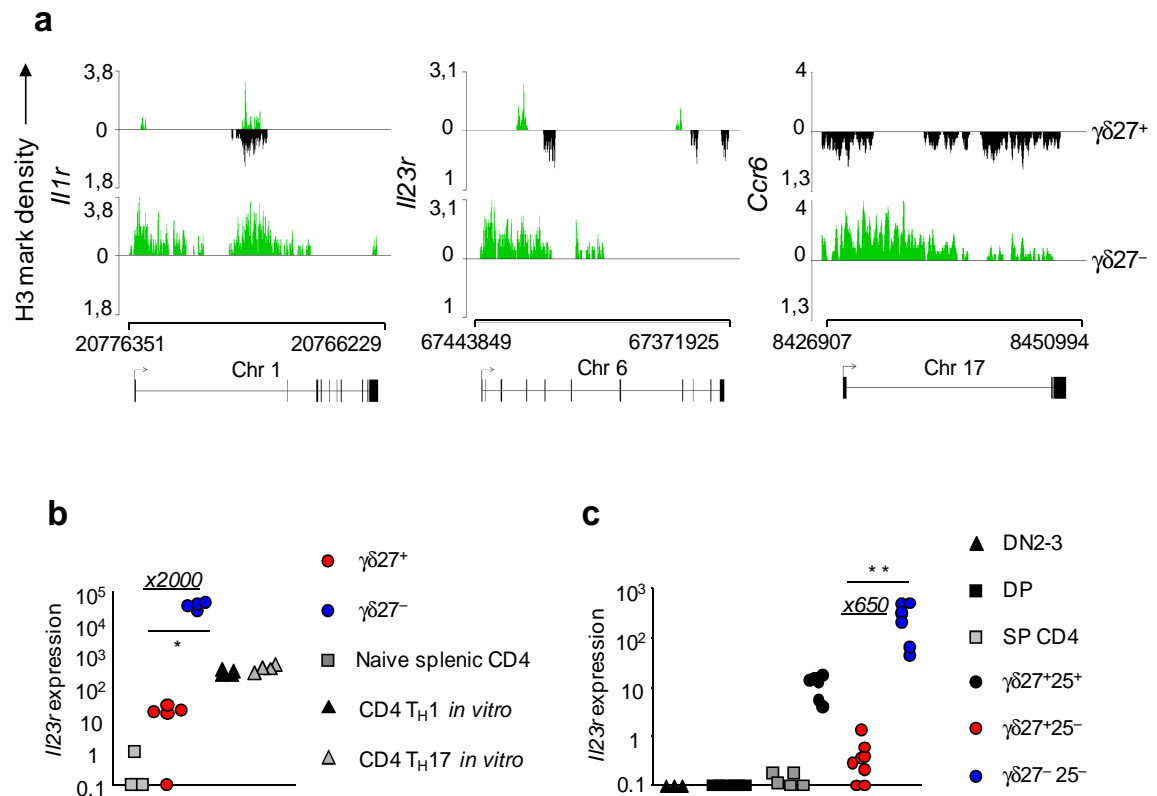

**Supplementary Fig. 5.** Histone H3 methylation patterns for *Il1r1*, *Il23r* and *Ccr6* in  $\gamma\delta$  T cell subsets. **(a)** ChIP-seq plots for H3K4me2 (green) and H3K27me3 (black) modifications on *Il1r1*, *Il23r* and *Ccr6* loci in peripheral CD27<sup>+</sup> ( $\gamma\delta^{27+}$ ) or CCR6<sup>+</sup> CD27<sup>-</sup> ( $\gamma\delta^{27-}$ )  $\gamma\delta$  T cells. **(b)** RT-qPCR data for *Il23r* expression on populations derived from peripheral T cells: *ex vivo* CD4<sup>+</sup>, CD27<sup>+</sup> ( $\gamma\delta^{27+}$ ) and CCR6<sup>+</sup> CD27<sup>-</sup> ( $\gamma\delta^{27-}$ )  $\gamma\delta$  cells; and *in vitro*-generated CD4<sup>+</sup> T<sub>H1</sub> and T<sub>H17</sub> cells. **(c)** RT-qPCR data for *Il23r* expression on thymocyte subsets: CD4<sup>-</sup> CD8<sup>-</sup> CD25<sup>+</sup>, double negative stages 2 and 3 (DN2-3) common progenitors; CD4<sup>+</sup> CD8<sup>+</sup> double positive (DP) and CD4<sup>+</sup> single positive (SP) cells of the  $\alpha\beta$  T cell lineage; and CD25<sup>+</sup> CD27<sup>+</sup> ( $\gamma\delta^{25+}$ ), CD25<sup>-</sup> CD27<sup>+</sup> ( $\gamma\delta^{27+}$ ) and CD25<sup>-</sup> CD27<sup>-</sup> ( $\gamma\delta^{27-}$ ) thymocytes of the  $\gamma\delta$  T cell lineage.

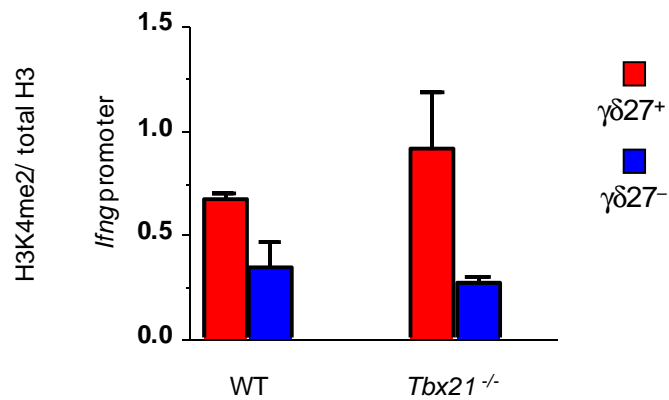

**Supplementary Fig. 6.** Histone H3K4me2 modifications on the *Ifng* promoter of *Tbx21*<sup>-/-</sup>  $\gamma\delta$  T cell subsets. Peripheral CD27<sup>+</sup> ( $\gamma\delta^{27+}$ ) or CD27<sup>-</sup> ( $\gamma\delta^{27-}$ )  $\gamma\delta$  T cells from wild-type (WT) or *Tbx21*-deficient (*Tbx21*<sup>-/-</sup>) mice were analyzed by ChIP-qPCR for H3K4me2 modifications on the *Ifng* promoter. Data are normalized against total H3 (mean  $\pm$  SD).

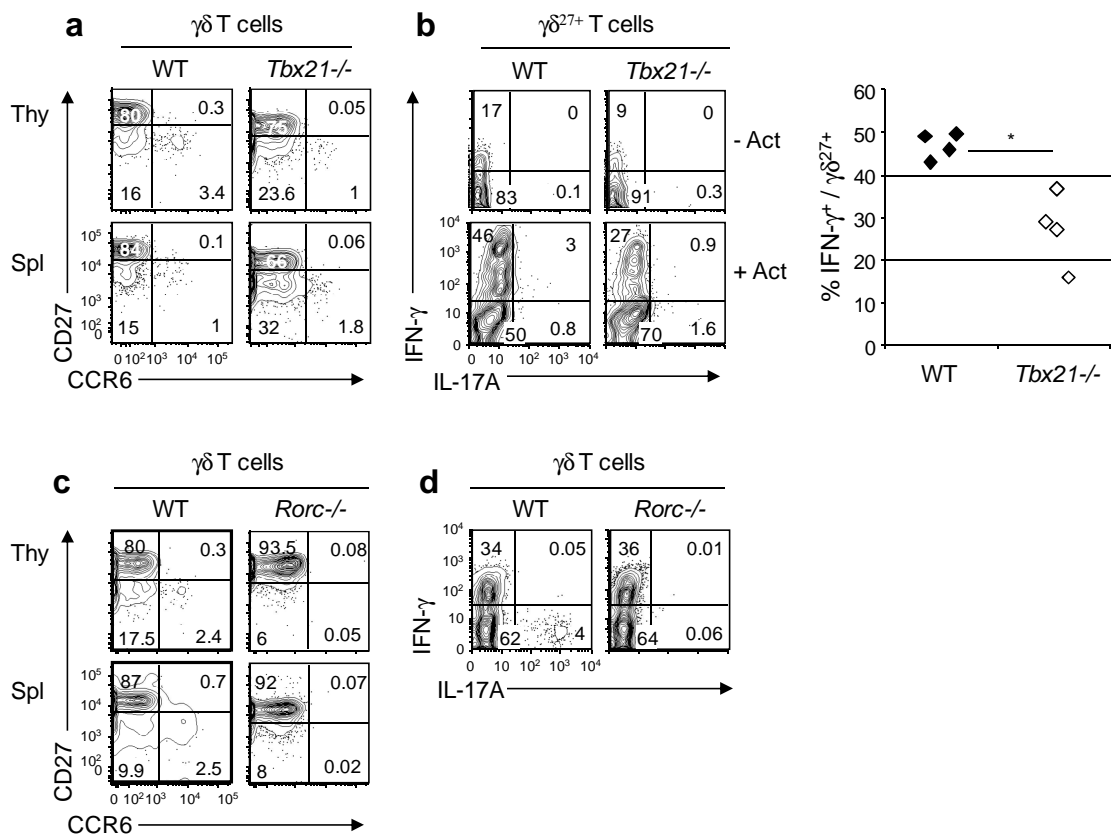

**Supplementary Fig. 7.** Analysis of effector  $\gamma\delta$  T cell populations in *Tbx21*<sup>-/-</sup> and *Rorc*<sup>-/-</sup> mice. Flow cytometry data for surface CD27 and CCR6 expression (**a,c**); and intracellular IFN- $\gamma$  and IL-17A cytokine production (**b,d**) in total  $\gamma\delta$  T cells (**a,c,d**) or CD27<sup>+</sup>  $\gamma\delta$  T cells (**b**).

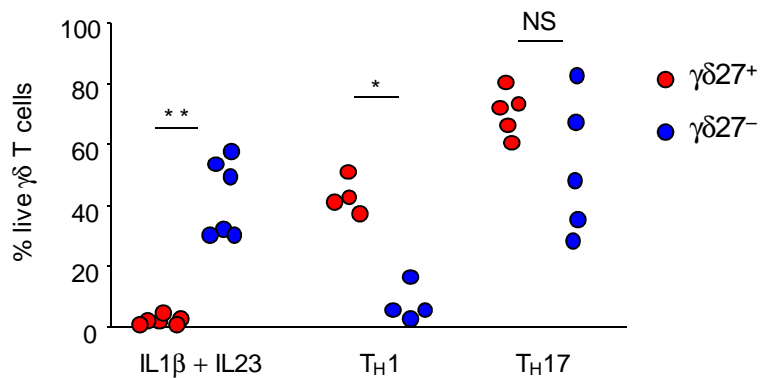

**Supplementary Fig. 8.** Maintenance of isolated  $\gamma\delta^{27+}$  and  $\gamma\delta^{27-}$  T cells in cytokine-defined culture media.  $\gamma\delta^{27+}$  and  $\gamma\delta^{27-}$  T cells were FACS-sorted from pooled spleen and lymph nodes from groups of 5 mice and stimulated for 48 hr in the presence of IL-1 $\beta$  plus IL-23, or standard T<sub>H</sub>1 or T<sub>H</sub>17 conditions (as described in Methods). Graph indicates percentages of live cells after 48 hr of culture, as assessed by forward/ side scatter on flow cytometry analyses. Each dot represents an independent culture. Mann-Whitney two-tailed statistical differences are indicated as NS, non significant; \*p<0.05; \*\*p<0.01.



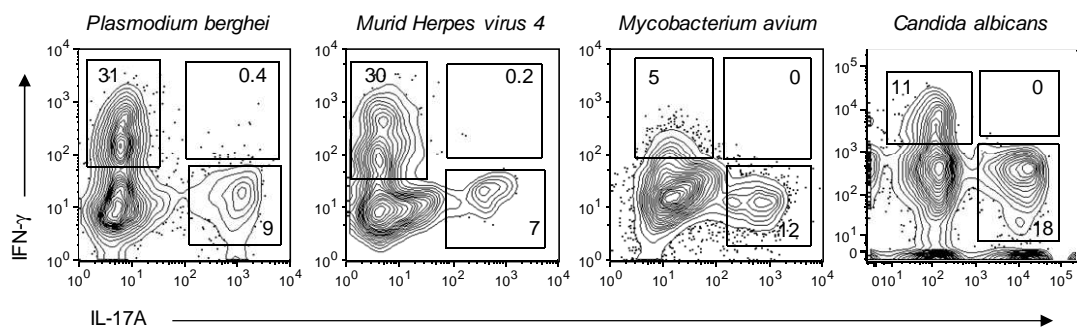

**Supplementary Fig. 9.** Cytokine production by peripheral lymphoid  $\gamma\delta$  T cells in systemic acute responses to infection. Flow cytometry analysis of intracellular IFN- $\gamma$  and IL-17A protein expression in total  $\gamma\delta$  T cells isolated from the spleen and lymph nodes of C57BL/6 mice infected with the noted microorganisms (as described in Methods). Cells were stimulated for 4 hr with PMA and ionomycin before intracellular staining. Numbers adjacent to outlined areas indicate percentages of IFN- $\gamma^+$ , IFN- $\gamma^+$  IL-17 $^+$  or IL-17 $^+$   $\gamma\delta$  T cells.

### SUPPLEMENTARY TABLE 1

Genes differentially modified by H3K4me2 or H3K27me3 marks between  $\gamma\delta^{27+}$  and  $\gamma\delta^{27-}$  T cells, or between CD4<sup>+</sup> T<sub>H</sub>1 and T<sub>H</sub>17 cell subsets.

The annexed Excel file (**Supplementary Table 1.xls**) lists all genes with differential H3K4me2 and H3K27me3 marks between *ex vivo*-isolated  $\gamma\delta^{27+}$  (gdCD27<sup>+</sup>) *versus*  $\gamma\delta^{27-}$  (gdCD27<sup>-</sup>) T cells; or between *in vitro*-generated T<sub>H</sub>1 *versus* T<sub>H</sub>17 CD4<sup>+</sup> populations. The ChIP-seq profiles of histone modifications were quantitatively analyzed using the bioinformatics tools (described in Methods). Only gene containing regions with a density fold-enrichment of 1.5 or above (for each comparison) are listed. The table contains gene symbol, transcript ID, chromosome start and end coordinates, gene region; gene ontology categories; and fold enrichment in the indicated population (relative to either gdCD27<sup>+</sup> *versus* gdCD27<sup>-</sup> or T<sub>H</sub>1 *versus* T<sub>H</sub>17 comparisons).

## SUPPLEMENTARY TABLE 2

Genes highly modified by H3K4me2 or H3K27me3 marks in  $\gamma\delta$  T cell subsets

| Histone Mark                | Gene Symbol     | Fold Change | $\gamma\delta$ Subset | Histone Mark | Fold Change | CD4 Subset | Histone Mark                         | Gene Symbol     | Fold Change | $\gamma\delta$ Subset | Histone Mark | Fold Change | CD4 Subset |
|-----------------------------|-----------------|-------------|-----------------------|--------------|-------------|------------|--------------------------------------|-----------------|-------------|-----------------------|--------------|-------------|------------|
| <b>Top 25 miscellaneous</b> |                 |             |                       |              |             |            | <b>Cytokines</b>                     |                 |             |                       |              |             |            |
| K4                          | <i>Gstcd</i>    | 67.74       | CD27-                 |              |             |            | K4                                   | <i>Il5</i>      | 20.17       | CD27-                 |              |             |            |
| K4                          | <i>Acyp2</i>    | 61.71       | CD27-                 |              |             |            | K4                                   | <i>Il21</i>     | 16.81       | CD27-                 |              |             |            |
| K4                          | <i>Dock8</i>    | 42.15       | CD27-                 | K27          | 13.57       | Th17       | K4                                   | <i>Il17a</i>    | 16.06       | CD27-                 | K4           | 11.89       | Th17       |
| K4                          | <i>Pdzd2</i>    | 42.15       | CD27-                 |              |             |            | K4                                   | <i>Il17f</i>    | 13.25       | CD27-                 | K4           | 8.08        | Th17       |
| K4                          | <i>Wwox</i>     | 37.63       | CD27-                 | K27          | 10.89       | Th17       | K4                                   | <i>Il22</i>     | 10.54       | CD27-                 |              |             |            |
|                             |                 |             |                       | K27          | 10.87       | Th1        | <b>Signal Transduction</b>           |                 |             |                       |              |             |            |
|                             |                 |             |                       | K4           | 9.72        | Th17       | K4                                   | <i>Tnk2</i>     | 24.33       | CD27-                 |              |             |            |
| K4                          | <i>Pla2g2d</i>  | 37.46       | CD27-                 |              |             |            | K4                                   | <i>Brca1</i>    | 20.07       | CD27-                 |              |             |            |
| K4                          | <i>Clp1</i>     | 37.20       | CD27+                 |              |             |            | K27                                  | <i>Pde3b</i>    | 16.75       | CD27-                 | K27          | 30.16       | Th17       |
| K4                          | <i>Dkk3</i>     | 34.62       | CD27-                 |              |             |            | K4                                   | <i>Prkca</i>    | 15.05       | CD27-                 | K4           | 46.33       | Th1        |
| K4                          | <i>Ccnq5</i>    | 33.12       | CD27-                 | K27          | 9.97        | Th17       | K4                                   | <i>Tiam1</i>    | 14.62       | CD27-                 | K27          | 15.08       | Th17       |
| K4                          | <i>Ppp1r14c</i> | 33.12       | CD27-                 | K27          | 16.39       | Th17       | K4                                   | <i>Psd</i>      | 13.55       | CD27-                 |              |             |            |
|                             |                 |             |                       | K4           | 13.97       | Th17       | K4                                   | <i>Wispl</i>    | 13.55       | CD27-                 |              |             |            |
| K4                          | <i>Sgip1</i>    | 30.10       | CD27-                 |              |             |            | K4                                   | <i>Optn</i>     | 13.17       | CD27-                 | K27          | 8.30        | Th17       |
| K4                          | <i>Zp1</i>      | 30.10       | CD27-                 |              |             |            | K4                                   | <i>Txn1</i>     | 12.04       | CD27-                 |              |             |            |
| K4                          | <i>Hivep1</i>   | 28.60       | CD27-                 |              |             |            | K4                                   | <i>Baiap2l1</i> | 11.83       | CD27-                 | K27          | 12.57       | Th17       |
| K4                          | <i>Slc17a4</i>  | 28.60       | CD27-                 |              |             |            | K4                                   | <i>Dapk1</i>    | 11.21       | CD27+                 |              |             |            |
| K4                          | <i>Dcp1b</i>    | 27.90       | CD27+                 |              |             |            | K4                                   | <i>Fgd3</i>     | 11.14       | CD27-                 | K4           | 8.76        | Th17       |
| K4                          | <i>Crmp1</i>    | 27.09       | CD27-                 |              |             |            | K4                                   | <i>Gpsm2</i>    | 11.04       | CD27-                 |              |             |            |
| K4                          | <i>Psme4</i>    | 27.09       | CD27-                 |              |             |            | K4                                   | <i>Irak3</i>    | 11.04       | CD27-                 |              |             |            |
| K4                          | <i>Ptk2</i>     | 27.09       | CD27-                 |              |             |            | K4                                   | <i>Sh3gl3</i>   | 11.04       | CD27-                 |              |             |            |
| K4                          | <i>Reps2</i>    | 27.09       | CD27-                 |              |             |            | K27                                  | <i>Gna15</i>    | 11.02       | CD27+                 | K27          | 8.01        | Th17       |
| K4                          | <i>Sntb2</i>    | 27.09       | CD27-                 | K27          | 15.08       | Th17       | K27                                  | <i>Pde8b</i>    | 10.61       | CD27+                 |              |             |            |
| K4                          | <i>Zranb3</i>   | 27.09       | CD27-                 |              |             |            | K4                                   | <i>Mapk10</i>   | 10.24       | CD27-                 | K4           | 9.45        | Th17       |
| K4                          | <i>Eif4g3</i>   | 26.34       | CD27-                 |              |             |            | K4                                   | <i>Cradd</i>    | 10.16       | CD27-                 | K27          | 18.85       | Th17       |
| K4                          | <i>Myom1</i>    | 25.59       | CD27-                 |              |             |            | K4                                   | <i>Bcar3</i>    | 10.03       | CD27-                 | K27          | 11.31       | Th17       |
| K4                          | <i>Zfp408</i>   | 25.25       | CD27+                 |              |             |            | K27                                  | <i>Bre</i>      | 9.79        | CD27+                 |              |             |            |
| K4                          | <i>Cdon</i>     | 25.09       | CD27-                 |              |             |            | K4                                   | <i>Rasgrp3</i>  | 9.78        | CD27-                 |              |             |            |
| <b>Receptor Activity</b>    |                 |             |                       |              |             |            | <b>Transcription Factor Activity</b> |                 |             |                       |              |             |            |
| K4                          | <i>Trpm6</i>    | 45.16       | CD27-                 | K27          | 16.97       | Th17       | K4                                   | <i>Zbtb38</i>   | 31.61       | CD27-                 |              |             |            |
| K4                          | <i>Nrp2</i>     | 37.20       | CD27+                 |              |             |            | K4                                   | <i>Tshz2</i>    | 21.26       | CD27+                 | K27          | 20.74       | Th17       |
| K4                          | <i>Il1r1</i>    | 33.12       | CD27-                 | K4           | 10.69       | Th17       | K4                                   | <i>Stat5b</i>   | 18.06       | CD27-                 |              |             |            |
| K4                          | <i>Il17rd</i>   | 28.60       | CD27-                 | K27          | 15.08       | Th17       | K27                                  | <i>Satb1</i>    | 14.70       | CD27-                 |              |             |            |
| K4                          | <i>Ntrk2</i>    | 24.91       | CD27+                 | K27          | 16.97       | Th17       | K4                                   | <i>Arnt2</i>    | 14.30       | CD27-                 |              |             |            |
| K4                          | <i>Fbn1</i>     | 21.92       | CD27+                 | K4           | 23.36       | Th1        | K27                                  | <i>Mef2c</i>    | 13.47       | CD27+                 |              |             |            |
| K4                          | <i>Pvrl1</i>    | 20.57       | CD27-                 | K27          | 16.02       | Th17       | K4                                   | <i>Mllt10</i>   | 12.54       | CD27-                 |              |             |            |
| K4                          | <i>Ptprn2</i>   | 19.57       | CD27-                 |              |             |            | K4                                   | <i>Dlx3</i>     | 12.29       | CD27+                 |              |             |            |
| K4                          | <i>Lrrn2</i>    | 17.23       | CD27-                 |              |             |            | K4                                   | <i>Gabpb2</i>   | 11.67       | CD27-                 |              |             |            |
| K4                          | <i>Gpr160</i>   | 16.86       | CD27-                 |              |             |            | K4                                   | <i>Vdr</i>      | 11.18       | CD27-                 |              |             |            |
| K4                          | <i>Grik1</i>    | 16.18       | CD27-                 | K27          | 16.34       | Th17       | K4                                   | <i>Atf6</i>     | 11.04       | CD27-                 |              |             |            |
| K4                          | <i>Gpr174</i>   | 15.81       | CD27-                 |              |             |            | K4                                   | <i>Runx2</i>    | 10.54       | CD27-                 |              |             |            |
| K4                          | <i>Itpr1</i>    | 15.81       | CD27-                 | K27          | 25.14       | Th17       | K4                                   | <i>Tcf7l1</i>   | 10.54       | CD27-                 |              |             |            |
| K4                          | <i>Scarf1</i>   | 14.30       | CD27-                 | K27          | 11.85       | Th17       | K4                                   | <i>Pbx1</i>     | 10.16       | CD27-                 | K27          | 25.77       | Th17       |
| K4                          | <i>Ramp1</i>    | 13.80       | CD27-                 |              |             |            | K4                                   | <i>Pbx3</i>     | 10.16       | CD27-                 | K27          | 25.77       | Th17       |
| K4                          | <i>Ccr6</i>     | 13.76       | CD27-                 |              |             |            | K27                                  | <i>Clock</i>    | 9.38        | CD27+                 |              |             |            |
| K4                          | <i>Xpr1</i>     | 13.55       | CD27-                 |              |             |            | K4                                   | <i>Lcor</i>     | 9.03        | CD27-                 |              |             |            |
| K4                          | <i>Ccr1</i>     | 12.26       | CD27-                 |              |             |            | K4                                   | <i>Rora</i>     | 9.03        | CD27-                 | K27          | 20.16       | Th1        |
| K4                          | <i>Ryk</i>      | 11.44       | CD27-                 |              |             |            |                                      |                 |             | K27                   | 15.08        | Th17        |            |
| K4                          | <i>Ptprm</i>    | 10.63       | CD27+                 | K27          | 14.61       | Th17       | K4                                   |                 |             | K4                    | 11.70        | Th17        |            |
| K4                          | <i>Tnfrsf4</i>  | 10.35       | CD27-                 |              |             |            | K4                                   | <i>Erg</i>      | 8.80        | CD27+                 |              |             |            |
| K4                          | <i>Vipr2</i>    | 10.11       | CD27-                 | K4           | 9.93        | Th17       | K4                                   | <i>Foxn2</i>    | 8.36        | CD27-                 |              |             |            |
| K4                          | <i>Grik2</i>    | 9.78        | CD27-                 | K27          | 12.57       | Th17       | K4                                   | <i>Arntl</i>    | 8.28        | CD27-                 |              |             |            |
| K4                          | <i>Sorl1</i>    | 9.78        | CD27-                 |              |             |            | K4                                   | <i>Nfatc2</i>   | 8.28        | CD27-                 |              |             |            |
| K4                          | <i>Ncoa7</i>    | 9.53        | CD27-                 |              |             |            |                                      |                 |             |                       |              |             |            |
| K4                          | <i>Stab1</i>    | 9.53        | CD27-                 |              |             |            |                                      |                 |             |                       |              |             |            |
| K4                          | <i>Igf1r</i>    | 9.46        | CD27-                 |              |             |            |                                      |                 |             |                       |              |             |            |
| K4                          | <i>Flt1</i>     | 9.43        | CD27+                 |              |             |            |                                      |                 |             |                       |              |             |            |
| K4                          | <i>Cd44</i>     | 9.41        | CD27-                 |              |             |            |                                      |                 |             |                       |              |             |            |
| K4                          | <i>Gpr98</i>    | 9.41        | CD27-                 |              |             |            |                                      |                 |             |                       |              |             |            |
| K4                          | <i>Slamf1</i>   | 9.28        | CD27-                 |              |             |            |                                      |                 |             |                       |              |             |            |
| K27                         | <i>Dner</i>     | 9.11        | CD27+                 | K27          | 10.10       | Th17       |                                      |                 |             |                       |              |             |            |
| K4                          | <i>Ptpra</i>    | 9.03        | CD27-                 |              |             |            |                                      |                 |             |                       |              |             |            |
| K27                         | <i>Grm7</i>     | 8.98        | CD27+                 | K27          | 33.94       | Th17       |                                      |                 |             |                       |              |             |            |
| K4                          | <i>Ptpn5</i>    | 8.92        | CD27+                 |              |             |            |                                      |                 |             |                       |              |             |            |
| K4                          | <i>Il1r2</i>    | 8.73        | CD27-                 | K27          | 10.77       | Th17       |                                      |                 |             |                       |              |             |            |
| K4                          | <i>Sema6a</i>   | 8.60        | CD27-                 |              |             |            |                                      |                 |             |                       |              |             |            |
| K4                          | <i>Ephb2</i>    | 8.35        | CD27+                 |              |             |            |                                      |                 |             |                       |              |             |            |
| K4                          | <i>Mtus1</i>    | 8.28        | CD27-                 | K27          | 11.92       | Th17       |                                      |                 |             |                       |              |             |            |
| K4                          | <i>Il23r</i>    | 8.03        | CD27-                 |              |             |            |                                      |                 |             |                       |              |             |            |

Selection of 120 genes highly differentially modified by H3K4me2 (K4) or H3K27me3 (K27) marks between CD27<sup>+</sup> and CD27<sup>-</sup>  $\gamma\delta$  T cell subsets. From the full list of differentially modified gene regions (**Supplementary Table 1**), a cut-off of 8-fold difference between CD27<sup>+</sup> and CD27<sup>-</sup>  $\gamma\delta$  T cells was used to select various candidates: the top 25 (miscellaneous) and genes belonging to particular functional categories of interest: receptor activity, cytokines, signal transduction and transcription factor activity. Differences above the 8-fold cut-off are also indicated for CD4<sup>+</sup> T<sub>H</sub>1 and T<sub>H</sub>17 cells. Details about coordinates of enriched regions within each gene are provided in Supplementary Table 1.

### SUPPLEMENTARY TABLE 3

List of primers used for ChIP-qPCR analyses

| Primer name           | FWD primer (5'-3')          | REV primer (5'-3')          |
|-----------------------|-----------------------------|-----------------------------|
| <i>Ifng Promoter</i>  | CGAGGAGCCTTCGATCAGGT        | GGTCAGCCGATGGCAGCTA         |
| <i>Ifng CNS-34</i>    | TGCTTTCTCCCCTGTCTCAATTAT    | ACACACACACACCCTTTCTTCATT    |
| <i>Il17a Promoter</i> | GAACTTCTGCCCTTCCCATCT       | CAGCACAGAACCACCCCTTT        |
| <i>Il17a CNS+5</i>    | AGGCCACAAATGTAGGTCAG        | CAGGCTGGGAAGTCTCTCTG        |
| <i>Il17f Promoter</i> | ACTGCATGACCCGAAAGCA         | TTTAATTCCCCCACAAAGCAA       |
| <i>Rorc</i>           | TCCAATACCTTGCCAAAAC         | CTTGCCTCGTTCTGGACTATAC      |
| <i>Eomes</i>          | TGGAGATATTCTGTCCACTTCG      | TCAGGGTTTTTCTTAAGTGTG       |
| <i>Tbx21</i>          | GGGAACCGCTTATATGTCCA        | GAGCTTTAGCTTCCCAAATGAA      |
| <i>Il22</i>           | TCCCTTATGGGGACTTTGG         | GGAAGTTGGACACCTCAAGC        |
| <i>Dock 8</i>         | CCTCTACCAATGGCATTTC         | ACACAAGGCTCTGTTGTAGCC       |
| <i>Dkk3</i>           | CAGAGCGAAACTCAAAACAGC       | GCCCAGAATAACCTCAAACCTGT     |
| <i>Scarf1</i>         | GCTTTTCCCATTGTGAGAC         | GGTTATTTATTGCACTGGTCACCT    |
| <i>Ephb2</i>          | CGCAGCAGTGGTCTCTCC          | TGAGAAACATTGGGCTGAA         |
| <i>Slamf1</i>         | ACTGGACCCTTATATTGTTTGAACCTT | GTCATGTTCTTACAACCTCATCTCATT |
| <i>Flt1</i>           | CAGCGCGTAAGGCAAGAC          | GCCAAGCAGAAGCAGGAG          |
| <i>Tnfrsf4</i>        | TCTCCAGGGCTATCTGACCA        | CCTCCTGGCCTCTCCTCTAA        |
| <i>Ccr1</i>           | CGATAACAAATTCCTCAATATCACTG  | TTGGGAAATGATGACAATGC        |
